# Supplementary material
Source: Research Square preprint supplement (doi:10.21203/rs.3.rs-9748357/v1)
Supplement: Supplementary file 1 [file 9fb1c16186cd703c9de6bb7b.docx]

Appendix Table 1 Composition and functional classification of the compound Chinese herbal medicine (CCHM) formula.

| **No.** | **Ingredient**  **(Pinyin)** | **Latin / Common Name** | **Source** | **Key Bioactive Compounds** | **Primary Functional Role in This Study** |
| --- | --- | --- | --- | --- | --- |
| 1 | Cangzhu | Atractylodis Rhizoma | Rhizome | Volatile oils | **Lipid-lowering** |
| 2 | Baizhu | Atractylodis Macrocephalae Rhizoma | Rhizome | Atractylodes polysaccharides | **Immune regulation / Gut health** |
| 3 | Houpo | Magnoliae Officinalis Cortex | Bark | Magnolol, honokiol | **Anti-inflammatory / Antioxidant** |
| 4 | Chenpi | Citri Reticulatae Pericarpium | Fruit peel | Flavonoids | **Digestive (Phagostimulant)** |
| 5 | Muxiang | Aucklandiae Radix | Root | Volatile oils | **Digestive** |
| 6 | Sharen | Amomi Fructus | Fruit/Seed | Volatile oils | **Digestive** |
| 7 | Shanzha | Crataegi Fructus | Fruit | Organic acids, flavonoids, vitamin C | **Antioxidant / Anti-inflammatory / Lipid-lowering** |
| 8 | Maiya | Hordei Fructus Germinatus | Germinated fruit | Amylase | **Digestive (Enzymatic)** |
| 9 | Shenqu | Massa Medicata Fermentata | Fermented mixture | Enzymes, vitamin B complex | **Growth promotion / Digestive** |
| 10 | Neijin | Galli Gigerii Endothelium Corneum | Chicken gizzard lining | Proteins, polysaccharides | **Digestive** |
| 11 | Shanyao | Dioscoreae Rhizoma | Rhizome | Polysaccharides | **Antioxidant / Anti-inflammatory / Immunomodulatory** |
| 12 | Zhishi | Aurantii Fructus Immaturus | Young fruit | Polyphenols, essential oils | **Digestive** |
| 13 | Gancao | Glycyrrhizae Radix et Rhizoma | Root & rhizome | Triterpenoids, flavonoids | **Antioxidant / Immune regulation** |
| 14 | Yunling (Poria) | Poria | Sclerotium | Pachyman (polysaccharides) | **Anti-inflammatory / Immune regulation** |
| 15 | Dangshen | Codonopsis Radix | Dried root | Saccharides, terpenoids | **Digestive / Immunomodulatory** |
| 16 | Huangqi | Astragali Radix | Root | Astragalus polysaccharides | **Antioxidant / Immunomodulatory** |
